# Supplementary material
Source: Research Square preprint supplement (doi:10.21203/rs.3.rs-9235756/v1)
Supplement: Supplementary file 1 [file b6fec1434188a6eba2fd3333.docx]

**Supplementary Table S1.** Dual-culture assay results for 60 endophytic bacterial isolates from Solanum sisymbriifolium against Fusarium oxysporum f. sp. melongenae (FomMRL1). Mycelial growth (cm) and inhibition percentages (mean ± SE) are shown at 5-, 8-, and 12-days post-inoculation (dpi). Significance markers indicate comparisons to the control based on t-test with Bonferroni correction performed on growth values: *** p < 0.001, ** p < 0.01, * p < 0.05. Values are presented as mean ± standard error (n = 3).

| **SL No.** | **Endophyte** | **Mycelial growth (cm)** | | | **Inhibition over control (%)** | | |
| --- | --- | --- | --- | --- | --- | --- | --- |
| **5d** | **8d** | **12d** | **5d** | **8d** | **12d** |
| 1 | Control | 3.33 ± 0.03 | 6.13 ± 0.07 | 8 ± 0 | 0 | 0 | 0 |
| 2 | MRL.B1 | 2.73 ± 0.07 | 4.67 ± 0.07 | 6.1 ± 0.06 | 18 | 23.9** | 23.8** |
| 3 | MRL.B10 | 2.53 ± 0.07 | 3.9 ± 0.06 | 6.13 ± 0.03 | 24 | 36.4** | 23.3** |
| 4 | MRL.B11 | 2.3 ± 0 | 4.33 ± 0.03 | 5.13 ± 0.07 | 31** | 29.3* | 35.8** |
| 5 | MRL.B12 | 2.7 ± 0 | 4.57 ± 0.03 | 5.67 ± 0.07 | 19** | 25.5* | 29.2** |
| 6 | MRL.B13 | 2.93 ± 0.07 | 4.93 ± 0.03 | 6.3 ± 0 | 12 | 19.6* | 21.3** |
| 7 | MRL.B14 | 2.37 ± 0.07 | 4.37 ± 0.03 | 5.57 ± 0.03 | 29 | 28.8* | 30.4** |
| 8 | MRL.B15 | 2.67 ± 0.03 | 4.67 ± 0.03 | 5.87 ± 0.03 | 20** | 23.9* | 26.7** |
| 9 | MRL.B16 | 2.87 ± 0.07 | 4.87 ± 0.07 | 6.1 ± 0.06 | 14 | 20.7* | 23.8** |
| 10 | MRL.B17 | 1.5 ± 0 | 1.97 ± 0.03 | 1.97 ± 0.03 | 55** | 67.9*** | 75.4** |
| 11 | MRL.B18 | 1.7 ± 0 | 2.03 ± 0.03 | 2.03 ± 0.03 | 49** | 66.8*** | 74.6** |
| 12 | MRL.B19 | 2.67 ± 0.17 | 5 ± 0.12 | 6.67 ± 0.03 | 20 | 18.5 | 16.7** |
| 13 | MRL.B2 | 2.07 ± 0.03 | 3.03 ± 0.03 | 3.03 ± 0.03 | 38*** | 50.5** | 62.1** |
| 14 | MRL.B20 | 2.77 ± 0.03 | 4.6 ± 0 | 5.97 ± 0.03 | 17* | 25** | 25.4** |
| 15 | MRL.B21 | 2.83 ± 0.03 | 5.07 ± 0.03 | 6.57 ± 0.03 | 15* | 17.4* | 17.9** |
| 16 | MRL.B22 | 1.47 ± 0.03 | 2.07 ± 0.03 | 2.07 ± 0.03 | 56*** | 66.3*** | 74.2** |
| 17 | MRL.B23 | 3.07 ± 0.03 | 5.1 ± 0.06 | 6.37 ± 0.03 | 8 | 16.8* | 20.4** |
| 18 | MRL.B24 | 2.67 ± 0.03 | 4.83 ± 0.03 | 5.13 ± 0.07 | 20** | 21.2* | 35.8** |
| 19 | MRL.B25 | 2.2 ± 0.1 | 4.03 ± 0.07 | 4.03 ± 0.07 | 34 | 34.2** | 49.6** |
| 20 | MRL.B26 | 2.3 ± 0.1 | 4.4 ± 0.1 | 5.87 ± 0.03 | 31 | 28.3* | 26.7** |
| 21 | MRL.B27 | 2.93 ± 0.03 | 4.83 ± 0.03 | 5.93 ± 0.03 | 12 | 21.2* | 25.8** |
| 22 | MRL.B28 | 2.73 ± 0.07 | 4.73 ± 0.03 | 6.1 ± 0.06 | 18 | 22.8* | 23.8** |
| 23 | MRL.B29 | 2.43 ± 0.03 | 3.4 ± 0.1 | 3.4 ± 0.1 | 27** | 44.6** | 57.5** |
| 24 | MRL.B3 | 3.07 ± 0.03 | 4.8 ± 0.06 | 5.83 ± 0.03 | 8 | 21.7** | 27.1** |
| 25 | MRL.B30 | 1.83 ± 0.03 | 2.83 ± 0.07 | 2.83 ± 0.07 | 45*** | 53.8*** | 64.6** |
| 26 | MRL.B31 | 2.2 ± 0 | 3.87 ± 0.03 | 5.63 ± 0.03 | 34** | 37** | 29.6** |
| 27 | MRL.B32 | 2.6 ± 0 | 4.17 ± 0.03 | 5.17 ± 0.09 | 22** | 32.1** | 35.4** |
| 28 | MRL.B33 | 2.63 ± 0.07 | 4.73 ± 0.03 | 6.2 ± 0.06 | 21 | 22.8* | 22.5** |
| 29 | MRL.B34 | 2.73 ± 0.07 | 4.53 ± 0.03 | 6.1 ± 0.1 | 18 | 26.1* | 23.8** |
| 30 | MRL.B35 | 2.4 ± 0 | 3.93 ± 0.07 | 5.6 ± 0.06 | 28** | 35.9** | 30** |
| 31 | MRL.B36 | 2.5 ± 0.1 | 3.5 ± 0.1 | 3.97 ± 0.03 | 25 | 42.9** | 50.4** |
| 32 | MRL.B37 | 2.13 ± 0.07 | 3.2 ± 0.06 | 3.5 ± 0.15 | 36* | 47.8*** | 56.2** |
| 33 | MRL.B38 | 2 ± 0 | 2.87 ± 0.07 | 5.27 ± 0.03 | 40** | 53.3*** | 34.2** |
| 34 | MRL.B39 | 2.2 ± 0.1 | 3.8 ± 0.06 | 5.43 ± 0.03 | 34 | 38*** | 32.1** |
| 35 | MRL.B4 | 2.8 ± 0 | 4.73 ± 0.03 | 6.33 ± 0.03 | 16** | 22.8* | 20.8** |
| 36 | MRL.B40 | 1.6 ± 0 | 2.07 ± 0.07 | 2.07 ± 0.07 | 52** | 66.3*** | 74.2** |
| 37 | MRL.B41 | 3 ± 0 | 4.83 ± 0.03 | 5.9 ± 0.06 | 10** | 21.2* | 26.2** |
| 38 | MRL.B42 | 2.83 ± 0.03 | 4.97 ± 0.03 | 6.23 ± 0.03 | 15* | 19* | 22.1** |
| 39 | MRL.B43 | 2 ± 0 | 3.37 ± 0.03 | 4.8 ± 0.06 | 40** | 45.1** | 40** |
| 40 | MRL.B44 | 1.7 ± 0 | 2.43 ± 0.03 | 2.43 ± 0.03 | 49** | 60.3** | 69.6** |
| 41 | MRL.B45 | 1.6 ± 0 | 2.23 ± 0.07 | 2.23 ± 0.07 | 52** | 63.6*** | 72.1** |
| 42 | MRL.B46 | 2.67 ± 0.07 | 3.87 ± 0.07 | 5.83 ± 0.03 | 20 | 37** | 27.1** |
| 43 | MRL.B47 | 2.57 ± 0.03 | 4.07 ± 0.07 | 5.9 ± 0.06 | 23** | 33.7** | 26.2** |
| 44 | MRL.B48 | 2.33 ± 0.17 | 4.6 ± 0 | 6.2 ± 0.06 | 30 | 25** | 22.5** |
| 45 | MRL.B49 | 2.5 ± 0 | 4.77 ± 0.03 | 6.4 ± 0 | 25** | 22.3* | 20** |
| 46 | MRL.B5 | 2.53 ± 0.07 | 3.77 ± 0.07 | 3.77 ± 0.07 | 24 | 38.6*** | 52.9** |
| 47 | MRL.B50 | 1.57 ± 0.07 | 2.03 ± 0.03 | 2.03 ± 0.03 | 53* | 66.8*** | 74.6** |
| 48 | MRL.B51 | 3 ± 0 | 5 ± 0.06 | 6.73 ± 0.07 | 10** | 18.5* | 15.8** |
| 49 | MRL.B52 | 2.43 ± 0.07 | 4.87 ± 0.03 | 6.67 ± 0.03 | 27 | 20.7* | 16.7** |
| 50 | MRL.B53 | 2.57 ± 0.07 | 5.07 ± 0.03 | 6.47 ± 0.03 | 23 | 17.4* | 19.2** |
| 51 | MRL.B54 | 1.77 ± 0.03 | 2.03 ± 0.03 | 2.03 ± 0.03 | 47*** | 66.8*** | 74.6** |
| 52 | MRL.B55 | 1.5 ± 0 | 2.03 ± 0.03 | 2.03 ± 0.03 | 55** | 66.8*** | 74.6** |
| 53 | MRL.B56 | 2.73 ± 0.03 | 5.23 ± 0.03 | 6.57 ± 0.03 | 18* | 14.7 | 17.9** |
| 54 | MRL.B57 | 1.87 ± 0.07 | 3.23 ± 0.12 | 3.8 ± 0.06 | 44* | 47.3* | 52.5** |
| 55 | MRL.B58 | 2.93 ± 0.03 | 5.3 ± 0.06 | 6.6 ± 0.06 | 12 | 13.6* | 17.5** |
| 56 | MRL.B59 | 1.6 ± 0 | 2.57 ± 0.09 | 2.57 ± 0.09 | 52** | 58.2*** | 67.9** |
| 57 | MRL.B6 | 2.37 ± 0.03 | 4.9 ± 0.1 | 6.2 ± 0.12 | 29** | 20.1 | 22.5** |
| 58 | MRL.B60 | 2.87 ± 0.07 | 5.47 ± 0.07 | 6.53 ± 0.09 | 14 | 10.9 | 18.3** |
| 59 | MRL.B7 | 2.8 ± 0 | 3.9 ± 0.06 | 5.9 ± 0.06 | 16** | 36.4** | 26.2** |
| 60 | MRL.B8 | 3.1 ± 0.1 | 5.23 ± 0.03 | 6.07 ± 0.07 | 7 | 14.7 | 24.2** |
| 61 | MRL.B9 | 2.7 ± 0.1 | 4.6 ± 0.06 | 6.1 ± 0.06 | 19 | 25** | 23.8** |
